# Supplementary material for: A short synthetic route to biologically active (±)-daurichromenic acid as highly potent anti-HIV agent
Source: Royal Society of Chemistry journal article supplement (doi:10.1039/b508577b), 2005-01-01

## A Short Synthetic Route to Biologically Active ( $\pm$ )-Daurichromenic Acid as Highly Potent Anti-HIV Agent

Yong Rok Lee\* and Xue Wang

School of Chemical Engineering and Technology, Yeungnam University, Gyeongsan 712-749, Korea

[yrlee@yu.ac.kr](mailto:yrlee@yu.ac.kr)

Phone: 82-53-810-2529. Fax: 82-53-810-4631

### Supporting Information

#### Table of Contents

1.  $^1\text{H}$  NMR of Compound **6** ----- S2
2.  $^{13}\text{C}$  NMR of Compound **6** ----- S3
3.  $^1\text{H}$  NMR of Compound **1** (Daurichromenic Acid) ----- S4

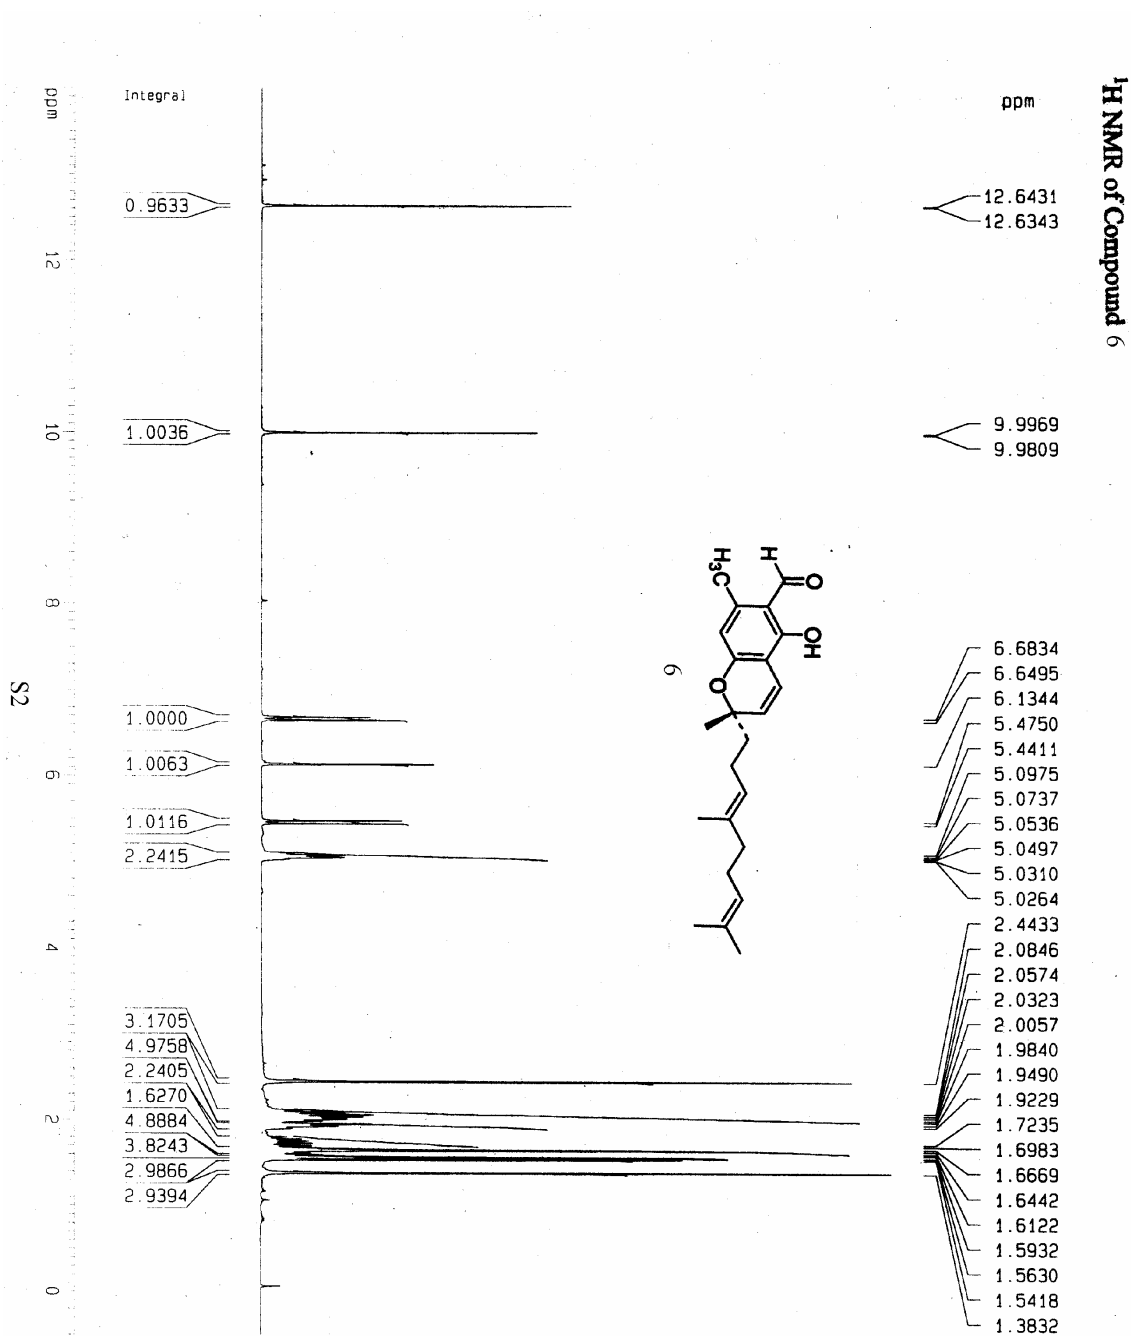

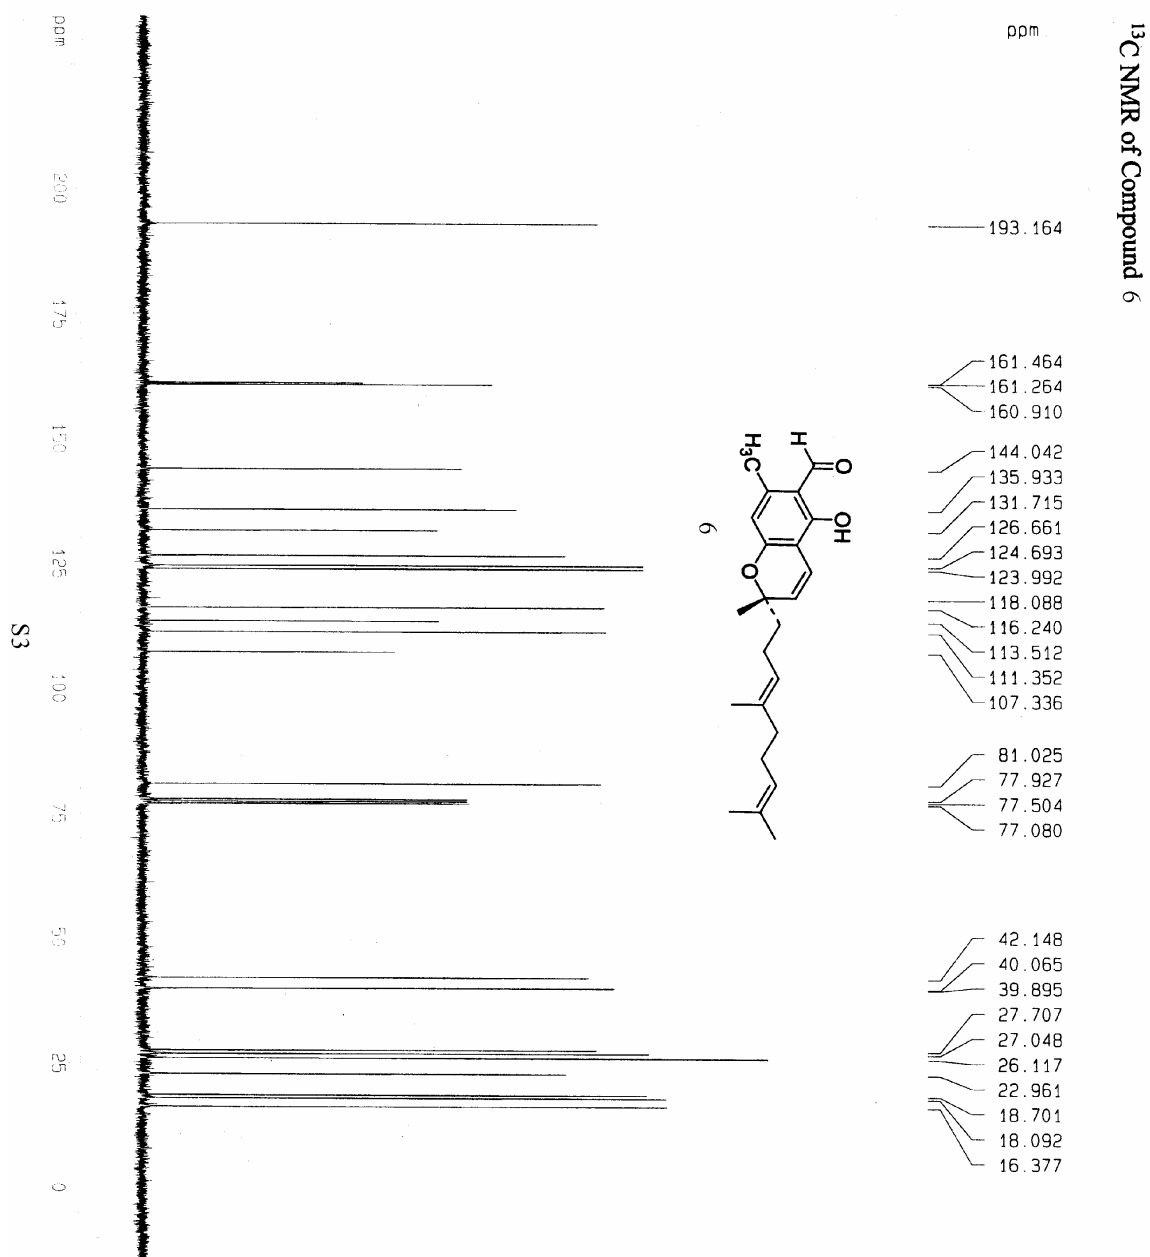

<sup>1</sup>H NMR of Compound 1 (Daurichromenic Acid)

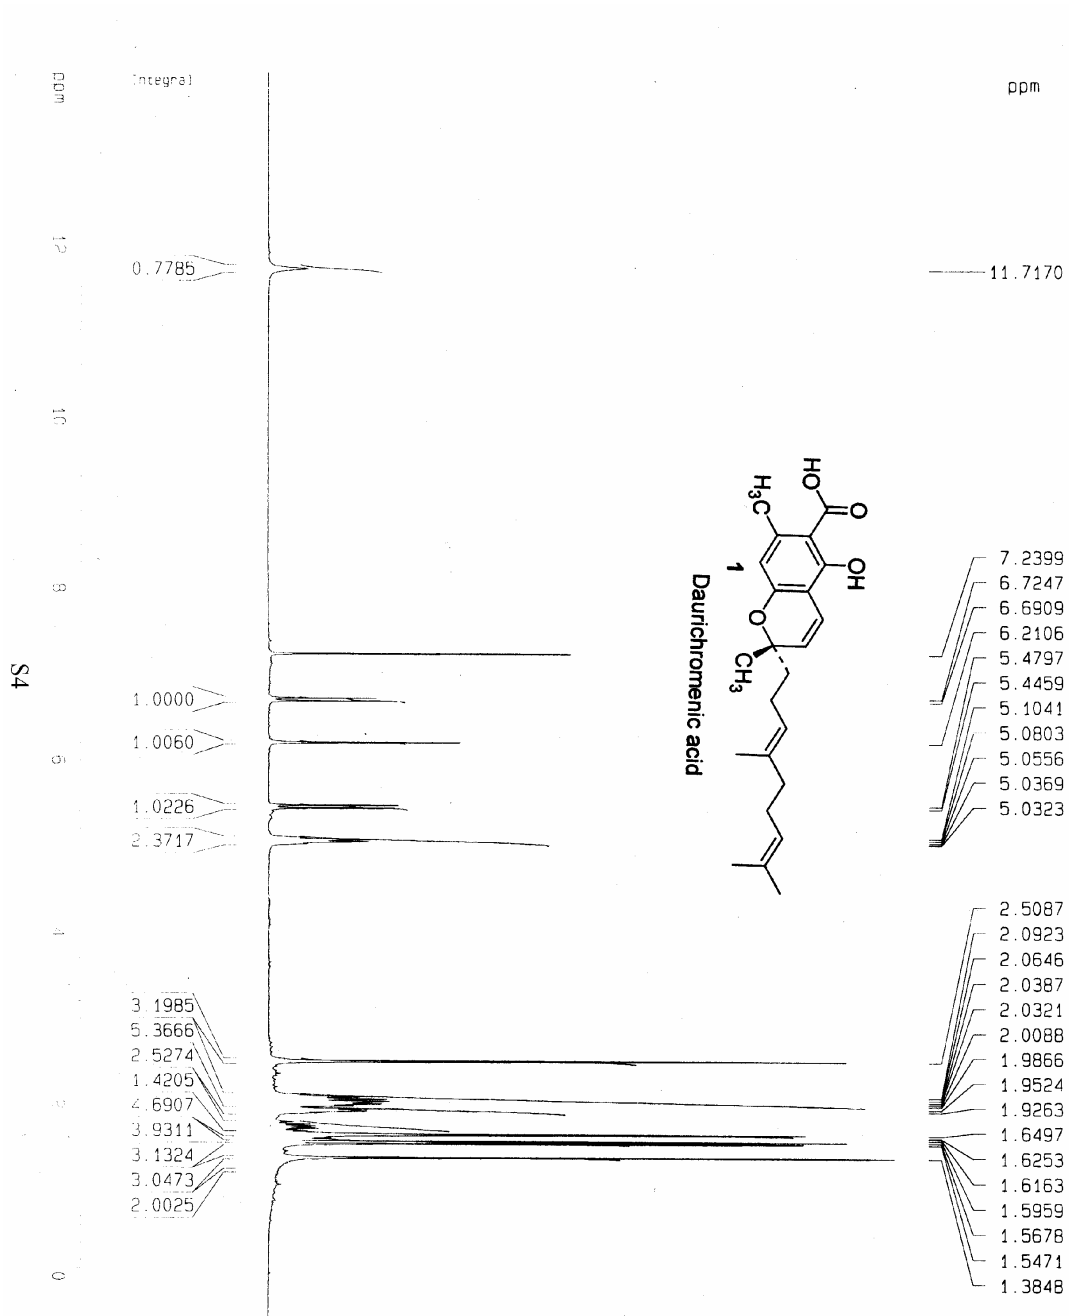

Supplement: b508577b.pdf [file b508577b.pdf]
